# Supplementary material
Source: Royal Society of Chemistry journal article supplement (doi:10.1039/d6tb00151c)
Supplement: d6tb00151c1.pdf [file d6tb00151c1.pdf]

## **Bioinspired Antimicrobial Peptide Hydrogel Dressing for Accelerated Healing of Infected Wounds**

Kunal Agam Kanaujia<sup>1,2</sup>, Dilip Kumar Arya<sup>1,3</sup>, Anit Kumar<sup>1</sup>, Shubham Kanaujiya<sup>1</sup>, Prashant Pandey<sup>1</sup>, Srinivas Ganjipete<sup>4</sup>, Shubhini A. Saraf<sup>5</sup>, Parasuram Pavadai<sup>4</sup>, P.S. Rajinikanth<sup>1,\*</sup>

<sup>1</sup>Department of Pharmaceutical Sciences, Babasaheb Bhimrao Ambedkar University, Lucknow 226025, India

<sup>2</sup>Faculty of Pharmacy, Khwaja Moinuddin Chishti Language University, Sitapur-Hardoi Bypass Road, Lucknow 226013, India

<sup>3</sup>Centre of Biomedical Research, Sanjay Gandhi Post-Graduate Institute of Medical Sciences Campus, Raebareli Road, Lucknow 226014, India

<sup>4</sup>Department of Pharmaceutical Chemistry, Faculty of Pharmacy, M.S. Ramaiah University of Applied Sciences, M S R Nagar, Bengaluru 560054, Karnataka, India

<sup>5</sup>Department of Pharmaceutics, National Institute of Pharmaceutical Education and Research (NIPER), Raebareli, Lucknow 226002, Uttar Pradesh, India

### **\*Corresponding author**

Prof. (Dr.) P.S. Rajinikanth

Professor (Pharmaceutics)

Department of Pharmaceutical Sciences

Babasaheb Bhimrao Ambedkar University, Lucknow, India

Email: [psrajinikanth222@gmail.com](mailto:psrajinikanth222@gmail.com)

**Table S1:** Optimization criteria for hydrogel formulation based on selected independent variables and corresponding dependent responses

| <b>Parameters</b>         | <b>Goal</b> | <b>Importance</b> |
|---------------------------|-------------|-------------------|
| CS (mg)                   | Minimum     | +++               |
| TPP (%w/v)                | Minimum     | +++               |
| Crosslinking time (hours) | In range    |                   |
| Viscosity (centipoise)    | Minimum     | +                 |
| Swelling index (%)        | Maximum     | +++               |

**Table S2:** Final optimized formulation composition and its theoretical response values

| <b>Parameter</b>          | <b>Optimised value</b> |
|---------------------------|------------------------|
| CS (mg)                   | 1000                   |
| TPP (%w/v)                | 0.5                    |
| Crosslinking time (hours) | 11.99                  |
| Viscosity (centipoise)    | 3474.39                |
| Swelling index (%)        | 272.259                |

**Table S3:** Predicted and experimental values of the final optimised formulation

| <b>Responses</b>       | <b>Predicted value</b> | <b>Experimental value</b> |
|------------------------|------------------------|---------------------------|
| Viscosity (centipoise) | 3474.39                | 3658.28                   |
| Swelling index (%)     | 272.259                | 312.43                    |
